# Supplementary material for: Regional index flood estimation at multiple durations with generalized additive models
Source: Copernicus journal article supplement (doi:10.5194/egusphere-2023-2335), 2023-10-18
Supplement: Supplementary file [file egusphere-2023-2335-AC1-supplement.pdf]

# Response to the reviewers

---

## Reviewer #2

We would like to thank the reviewer for their comments and recognize the time commitment such a review requires. We very much appreciate each of the comments we received. Please find our responses below.

1. *The title is confusing and misleading in different aspects, such as: - different durations could be understood simultaneously or as a variable - the index flood model is based on quantile while the paper treats only the median (fixed quantile order)*

Reply: We appreciate the input and will change the title to “Regional median flood estimation with generalized additive models: model selection across durations” to avoid confusion. We are happy to consider further revisions if necessary.

2. *why not using directly and fully Machine Learning? The compatibility between a statistical model GAM and variable selection method based on ML should be discussed. Especially, later in the paper, there is a formal method to select variables for GAM (implemented in mgcv package). In the same idea, (line 43) I’m wondering if the authors are using a modified version of IIS. Hence, this method should be checked and validated before for this choice/context. The question is about the compatibility of this change.*

Reply: We do implement and test a full machine learning model (XGBoost). However, XGBoost does not provide uncertainty estimates. It is also not easily interpreted. We therefore consider the GAM and log-linear model in addition.

The reviewer comments on the availability of a formal method to select GAM predictors within mgcv. Indeed, the predictor set used in the GAM was validated by the formal statistical (shrinkage) methods within the mgcv package (lines 287-288). We apologize that this was not clear in the original version of the manuscript.

Our end goal was always use of the shrinkage methods within mgcv, but our original predictor set (Table 1) contained too many potential variables. Many of these variables are collinear. The shrinkage methods implemented in mgcv are not feasible for such a large, collinear predictor set. In order to use the methods in mgcv, we must select a subset of predictors. Rather than relying solely on expert judgement to select this subset, we use in addition a data-driven approach.

The workflow for predictor selection therefore has three steps. First, a machine learning-based algorithm for predictor selection is applied to the full regional covariate set to generate a “pre-selection set”. Next, expert judgement decides if this pre-selection set is reasonable, and adds or subtracts predictors as needed. In our study, we added a precipitation variable ( $P_{Sep}$ ). Finally, the shrinkage methods within mgcv are applied to the chosen subset. In our study, every predictor in the chosen subset was deemed significant by mgcv. This coincidence might be why the predictor selection process seemed somewhat ambiguous.

The idea with this workflow is that the first step has the potential to uncover predictor information that was previously unclear. At the same time, as discussed in Section 3 (study design), the output from the machine learning pre-selection step is kept completely separate from the rest of the analysis, i.e.

predictors proposed by either machine-learning pre-selection or expert judgement are \*not\* used until they are validated by formal, GAM-specific selection methods that have been rigorously compared to existing methodologies.

Predictor selection for data-driven models (e.g. GAMs) is in general challenging and a major roadblock to setting up analyses such as this one. Hence, we find it beneficial to include our work with the machine-learning based pre-selection approach, even though it serves as just a supporting component to expert judgement, and all formal variable selection is done within the GAM. A machine-learning based pre-selection is in no way a “silver bullet” that is guaranteed to produce a predictor set that will be useful to a GAM. This is discussed on lines 570-577. Development of this pre-selection required a series of careful choices about which algorithm and machine learning model architecture to use, ensuring they could complement GAM development. We discuss and provide rationale for the major choices involved. For example, we discuss our choice to use the IIS algorithm to cut down on the collinearity of the selected predictors, and our choice to use a boosted tree ensemble instead of a bagged tree ensemble within the IIS algorithm (Section 4.1, lines 230-259 and Appendix C, lines 631-641). Following the reviewer’s comments and suggestions we will provide more explanation on the choices in our procedure and the pros and cons of other alternatives.

3. ***around lines 40-45: this text is ambiguous and not well justified/ motivated. It is based on a unique old paper (see next comments for recent papers). This is part is crucial and motivates the study. Hence, the paper motivation and foundation are questionable.***

Reply: We will revise this section of the introduction to emphasize that the motivation behind evaluating duration-specific differences in regression models comes from the practical necessity of understanding whether a model’s performance will decline when applied to durations different from the one it was originally developed for. The publication mentioned was chosen as an illustrative example since it refers to a class of models that simultaneously estimate several durations at once, which of course would be problematic if there were, in fact, duration specific differences.

4. ***Indeed it is more informative to include the duration in the modeling. However, to deal with the duration, it is now appropriate to consider a multivariate framework involving the duration as a variable and simultaneously with other variable like the peak and/volume. The multivariate regional framework, index flood model, is already developed (e.g. Requena et al. 2016, J. of Hydrology; Azam et al. 2018, Water).***

Reply: There are important differences between the current study and the multivariate frameworks mentioned above. We apologize that these differences were not made clear in the original manuscript and will clarify in a revised version of the manuscript.

Regional multivariate frameworks that “treat the duration as a variable” focus on explicitly modeling the dependency structure between different multivariate aspects of events (for example, drought duration and severity [Azam et al., 2018] and flood volume and peak for [Requena et al., 2016]). The modeled dependencies are then transferred to ungauged locations.

Transfer of variable dependencies to ungauged catchments is not a goal of this study. Instead, we build models independently for each duration and examine whether there are statistically significant differences in the relationships between catchment descriptors and the response across different durations. The focus in our study is on this catchment descriptor – response relationship. A goal is to develop a better understanding of the situations where specific regression models may or may

not perform well. This is important groundwork when formulating more complex regionalization approaches, and we hope our study can contribute to this foundational aspect.

Both approaches (the event-based, multivariate approach and the aggregation-based approach we take in this study) are useful, and can be used to find different types of design values where duration is involved. Our design values are meant to support engineering design which requires flood volumes for pre-determined durations, sometimes averaged across several flood events, rather than the multivariate variability of specific flood events.

**5. *why this and only these values (1h and 24h)?***

Reply: These are the values that are most relevant to flood guidelines in Norway.

**6. *Around line 60: Dealing with nonlinearity is not only through transformation but directly using nonlinear approaches (see e.g. Ouali et al. 2017, J. Advances in Modeling Earth Systems; Cannon 2018, Stochastic environmental research and risk).***

Reply: We thank the reviewer for this contribution and will update the manuscript to provide this context on nonlinear approaches.

**7. *line 108: not sure about this statement, especially no refs given. As far as I know, variable selection is not the strength of ML. I don't know what is reported in Guisan et al. 2002, but it may be not up to date (given the fast development of ML).***

Reply: We will update our references following lines 108-110 to include the more recent publication [Kovács, 2022]; the [Guisan et al., 2002] reference was chosen because it was very clearly written and the idea proposed focused on a broad class of machine learning models (classification and regression tree techniques, or CARTs) that are still in use today. Variable (or feature) selection is a prominent machine learning discipline [Guyon and Elisseeff, 2003] and variable selection by ensemble methods, in particular, has been a focus in recent years [Bolón-Canedo and Alonso-Betanzos, 2019]. The approach used in our study is an ensemble method, i.e. a gradient boosted tree ensemble.

**8. *line 115: I'm surprised to see that such an important topic is treated only in the hydrological framework. It is questionable to heavily rely on this.***

Reply: We selected examples from hydrology to demonstrate that these approaches are used in the hydrological community. We will update the manuscript to provide some additional examples from the broader category of applied statistics.

**9. *Last line page 4: This assumption is either strong or in contradiction with the problematic to be treated in the paper.***

Reply: We focus on identification of duration-specific differences in the relationship between predictors and the median flood. We cannot do this if both (i) the predictor set itself and (ii) the data-driven relationship between predictors and response is changing at each duration. Moreover, we investigated if different durations benefited from having different predictor sets, but found no compelling evidence to support this (see Fig. 4).

10. *It is important to provide an equation for “median annual maximum flood” to be explicit and avoid confusion.*

Reply: We will include an equation for the median annual maximum flood.

11. *Some parts of the methodology should be in the results section (section 4.2 and from line 250).*

Reply: We realize placing the predictor selection prior to the results is unusual, but we feel the story is more understandable this way, and we want to emphasize the model performance and model interpretation in the results section. We are, however, happy to reconsider if the reviewer feels strongly about this.

12. *Equation 6: something is missing or wrong. The right-hand side does not depend on  $i$  (so the summation is over what?).*

Reply: We thank the reviewer for noticing the indexing variable was omitted here and will fix this in a revised version of the manuscript.

13. *Using the term permutation test could be misleading since this is a generic term on how to obtain  $p$ -value.*

Reply: The term *permutation test* is standard, but the test can also be called a Fisher permutation or randomization test [Fisher, 1936, Good, 2013, Holt and Sullivan, 2023]. We will update our description in the manuscript.

## References

- [Azam et al., 2018] Azam, M., Maeng, S. J., Kim, H. S., and Murtazaev, A. (2018). Copula-based stochastic simulation for regional drought risk assessment in south korea. *Water*, 10(4):359.
- [Bolón-Canedo and Alonso-Betanzos, 2019] Bolón-Canedo, V. and Alonso-Betanzos, A. (2019). Ensembles for feature selection: A review and future trends. *Information Fusion*, 52:1–12.
- [Fisher, 1936] Fisher, R. A. (1936). Design of experiments. *British Medical Journal*, 1(3923):554.
- [Good, 2013] Good, P. (2013). *Permutation tests: a practical guide to resampling methods for testing hypotheses*. Springer Science & Business Media.
- [Guisan et al., 2002] Guisan, A., Edwards Jr, T. C., and Hastie, T. (2002). Generalized linear and generalized additive models in studies of species distributions: setting the scene. *Ecological modelling*, 157(2-3):89–100.
- [Guyon and Elisseeff, 2003] Guyon, I. and Elisseeff, A. (2003). An introduction to variable and feature selection. *Journal of machine learning research*, 3(Mar):1157–1182.
- [Holt and Sullivan, 2023] Holt, C. A. and Sullivan, S. P. (2023). Permutation tests for experimental data. *Experimental Economics*, pages 1–38.
- [Kovács, 2022] Kovács, L. (2022). Feature selection algorithms in generalized additive models under concavity. *Computational Statistics*, pages 1–33.

[Requena et al., 2016] Requena, A. I., Chebana, F., and Mediero, L. (2016). A complete procedure for multivariate index-flood model application. *Journal of Hydrology*, 535:559–580.
